# Supplementary material for: Prognosis and regulation of an adenylyl cyclase network in acute myeloid leukemia
Source: Aging (Albany NY). 2020 Jun 22;12(12):11864–77. doi: 10.18632/aging.103357 (PMC7343484; doi:10.18632/aging.103357)
Supplement: Supplementary Table 1 [file aging-12-103357-s001..xlsx]

## Sheet: 工作表1
Supplementary Table 1. The 58 most frequently altered neighbor genes (FANGs)
ADCY1
ADCY2
ADCY3
ADCY4
ADCY5
ADCY6
ADCY7
ADCY9
AK1
ATP5F1A
ATP5F1B
ATP5F1C
ATP5F1D
ATP5F1EP2
ATP5MGL
ATP5PB
CALM2
CMPK1
DMAC2L
EDN1
GNAI1
GNAI2
GNAI3
GNAS
GNB1
GNB3
GNB4
GNB5
GNG1O
GNG11
GNG12
GNG13
GNG5
GNG7
GNG8
GNGT1
GRM2
GRM3
HCN3
IFT122
INCENP
IQGAP1
NUDT11
PRKACA
PRKACB
PRKACG
PRKAR1A
PRKAR1B
PRKAR2A
PRKAR2B
PRKCE
PRKX
RAPGEF3
SLC25A4
TC21 B
VDAC1
VDAC3
WDR19
