# Supplementary material for: Prognosis and regulation of an adenylyl cyclase network in acute myeloid leukemia
Source: Aging (Albany NY). 2020 Jun 22;12(12):11864–77. doi: 10.18632/aging.103357 (PMC7343484; doi:10.18632/aging.103357)
Supplement: Supplementary Table 2 [file aging-12-103357-s002..xlsx]

## Sheet: Sheet2
Supplementary Table 2. ADCY expression levels between the wild type (WT) and mutation (MUT) groups in AML.
Mutation	ADCY1	ADCY3	ADCY2	ADCY4	ADCY7	ADCY5	ADCY6	ADCY9
ASXL1
mut (n=2)	0.0187463585 ± 0.00784892416204363	4.563749301 ± 0.8525818448359	0.132674129 ± 0.00428215522826556	0.8880581485 ± 0.294951008884438	4.8474693375 ± 0.115618702401373	0.090597566 ± 0.021863693591027	2.981852166 ± 0.0692857547169737	3.309084707 ± 0.189849665668224
wt (n=149)	0.144024085295302 ± 0.295725168026073	3.46512630503356 ± 0.926788697879054	0.237150235362416 ± 0.561937995055601	1.19080924666443 ± 0.826828081161608	4.02310553257718 ± 1.12201448601823	0.0849252727785235 ± 0.0483058828092324	1.86295703494631 ± 1.23157232960514	2.2294337493557 ± 1.18420002266812
P value	0.551329	0.0977863	0.793633	0.606689	0.302072	0.868852	0.202331	0.200787
CEBPA
mut (n=13)	0.0470245588461538 ± 0.0219853063528726	4.16359055538462 ± 0.603888579276008	0.0814151718461538 ± 0.20692193873818	1.18335695792308 ± 0.742901437823106	4.36662028246154 ± 0.782652777287538	0.0848554644615385 ± 0.0449247309283506	1.29214414338462 ± 1.12683776217235	0.808331912769231 ± 0.733170399068791
wt (n=138)	0.151346102615942 ± 0.306130018969138	3.41525102052174 ± 0.932784942821583	0.250306783282609 ± 0.578845220302117	1.18712357678985 ± 0.831954419654339	4.00269274896377 ± 1.14225441245732	0.0850140560724638 ± 0.0484560356734382	1.93294513532609 ± 1.22873677618783	2.37895277682609 ± 1.12737227150439
P value	0.222625	0.00526083	0.298638	0.987467	0.263488	0.990963	0.0724366	2.2883e-06
FLT3
mut (n=42)	0.176425914047619 ± 0.328260362490132	3.36181141245238 ± 0.838415087789949	0.533132693238095 ± 0.826698338579912	1.06834559740476 ± 0.684185634305224	4.10745013195238 ± 1.018669524202	0.0994376195476191 ± 0.0557993333195573	1.64379289030952 ± 1.08980726419184	2.30976839476191 ± 1.17376100095087
wt (n=109)	0.129240303082569 ± 0.280354977928624	3.52509393329358 ± 0.965146036873604	0.12118495606422 ± 0.354737108575621	1.23244200879816 ± 0.868365847781877	4.00573172006422 ± 1.15796469121774	0.079437438119266 ± 0.0436855119615122	1.96793579033028 ± 1.27321835033079	2.21828922466055 ± 1.1907872753433
P value	0.378785	0.336276	3.1712e-05	0.273345	0.61819	0.0213241	0.14739	0.671698
IDH1
mut (n=14)	0.128104668 ± 0.164069767914983	3.52714167742857 ± 1.15512233778828	0.142083570142857 ± 0.196671122319399	1.67719152185714 ± 0.956324850022725	3.63063400107143 ± 1.07209395652448	0.0780733841428572 ± 0.0349020409148529	2.37751156271429 ± 1.15563702025849	2.01833890592857 ± 0.936565231043337
wt (n=137)	0.143822015138686 ± 0.304633953274422	3.47482725962044 ± 0.910925616909632	0.245339878430657 ± 0.58232480868331	1.13668622440876 ± 0.794499557477253	4.07524662054015 ± 1.11876118331454	0.0857082729781022 ± 0.0492082122570539	1.82670905591971 ± 1.22996436235904	2.2667668130292 ± 1.20566775209451
P value	0.849681	0.842177	0.511621	0.0186515	0.157274	0.572679	0.110777	0.455998
IDH2
mut (n=16)	0.14290627 ± 0.216787141547893	3.3880345104375 ± 1.13102237891927	0.1312904808125 ± 0.196505805317559	1.821494334 ± 1.02712153696255	4.4910636680625 ± 0.864906282735844	0.08999777325 ± 0.0672609236303732	2.1133505798125 ± 1.27762702290644	2.2595966056875 ± 0.959717720107727
wt (n=135)	0.142300600785185 ± 0.302590545924933	3.49053900655556 ± 0.909703541193879	0.248148782474074 ± 0.585786864051404	1.11157618300741 ± 0.764966648107849	3.97985662474074 ± 1.13530503706855	0.0844081215111111 ± 0.0455141387219858	1.84985698712593 ± 1.22620453205717	2.24185372131111 ± 1.20960360202794
P value	0.993816	0.678795	0.430409	0.000937495	0.0838914	0.661253	0.419663	0.954986
KIT
mut (n=7)	0.045522367 ± 0.0197430337866216	3.98515938514286 ± 0.698276594667013	0.0125871788571429 ± 0.00578509908545741	0.734528641714286 ± 0.484946441439179	3.46235643071429 ± 1.84358126794716	0.0632089508571429 ± 0.0229234751612908	2.20282879585714 ± 1.13700853983304	2.913234579 ± 1.09438322749513
wt (n=144)	0.147072394840278 ± 0.300383847727498	3.45510557191667 ± 0.936555651940589	0.246615438020833 ± 0.569568263899007	1.20878467748611 ± 0.830093151781195	4.06181366676389 ± 1.07379001930802	0.0860597091666667 ± 0.0487074021477478	1.86197570116667 ± 1.235900096406	2.2111885834375 ± 1.18086450917872
P value	0.374088	0.142181	0.280271	0.136738	0.166923	0.220045	0.475863	0.125574
MLL
mut (n=52)	0.157747018192308 ± 0.311374269865632	3.45342770613462 ± 0.955275246892286	0.289940921846154 ± 0.696683702424572	1.24783716530769 ± 0.654635132298141	4.04448908757692 ± 1.1164361191098	0.080083676 ± 0.0402719252045033	1.68050027357692 ± 1.17752604394592	2.31340175515385 ± 1.29719812747092
wt (n=99)	0.134285216969697 ± 0.285905598431352	3.49346542760606 ± 0.923816645456055	0.207311165565657 ± 0.471316072614271	1.15473900458586 ± 0.899523121255059	4.02852758055556 ± 1.12530070473261	0.0875829254949494 ± 0.0516328079215316	1.98139685164647 ± 1.25012591425869	2.20714047272727 ± 1.12339419764819
P value	0.64291	0.802849	0.389291	0.510434	0.933928	0.363591	0.153862	0.601576
NPM1
mut (n=37)	0.239927530810811 ± 0.39891895148983	2.94551179662162 ± 0.794555094534421	0.580622610513513 ± 0.860676490523609	1.48979714210811 ± 0.833799601422669	4.12995477545946 ± 1.01117701595958	0.0888541071891892 ± 0.0454494056753186	1.40310781016216 ± 1.08050959305822	1.93721885543243 ± 1.14488412477304
wt (n=114)	0.110699673561404 ± 0.24492615747456	3.65304720681579 ± 0.909732631181945	0.123839445070175 ± 0.35524199292958	1.08845789291228 ± 0.797784156508327	4.00288891523684 ± 1.15373156153581	0.0837496386842105 ± 0.0489538497405275	2.03183608388597 ± 1.24048689362028	2.34321667032456 ± 1.1828025142872
P value	0.0197054	4.00541e-05	8.72614e-06	0.00944382	0.550009	0.575963	0.00649772	0.0695272
RAS
mut (n=14)	0.238045472357143 ± 0.599887143576014	3.18221504757143 ± 1.17521672603797	0.0374663342142857 ± 0.0732360364028412	1.17611803957143 ± 0.798532679907729	4.22791558235714 ± 1.09583859300356	0.0817378408571428 ± 0.0406412480080546	2.05790870542857 ± 1.49186825977361	1.86577338857143 ± 1.38987199270156
wt (n=137)	0.132587188416058 ± 0.244868365954623	3.51007523639416 ± 0.90306453170933	0.256030690861314 ± 0.582083309664997	1.18789081383942 ± 0.827629625238698	4.01421054654015 ± 1.1228995209339	0.0853338029489051 ± 0.0488286964268073	1.85936920191971 ± 1.20514552863161	2.28235744983941 ± 1.15861303405454
P value	0.202289	0.210916	0.163691	0.959513	0.497753	0.790562	0.566859	0.210509
TET2
mut (n=12)	0.114218005 ± 0.184181608542165	3.69697212508333 ± 1.01141550651528	0.19031402125 ± 0.188241429310952	0.925117326666667 ± 0.624709843947973	4.08024985925 ± 1.12932795903363	0.0645909328333333 ± 0.0321503885988774	2.16983651325 ± 1.53948190014068	2.23726988216667 ± 1.31470712242473
wt (n=139)	0.144794714863309 ± 0.30205402185874	3.46091836367626 ± 0.92612444043535	0.239690396201439 ± 0.579476544915183	1.20939054769784 ± 0.835193894583957	4.0300335591223 ± 1.12164832989985	0.0867623710935252 ± 0.0488337269972505	1.85256305309353 ± 1.20318269376181	2.24429179483453 ± 1.17605242487736
P value	0.730933	0.4016	0.769899	0.251943	0.881974	0.125301	0.393093	0.984338
WT1
mut (n=10)	0.1276812798 ± 0.145312690798551	3.7698909381 ± 0.66651999334535	0.5643439227 ± 1.09285317091992	1.2189626178 ± 0.653449534300255	3.8963969415 ± 0.494119339585425	0.085815062 ± 0.0202049454764856	2.2710274121 ± 1.0030533615058	1.5375892437 ± 1.32586788326119
wt (n=141)	0.14340616048227 ± 0.302156338552125	3.45909509695745 ± 0.946162836718708	0.212463078723404 ± 0.498934607437202	1.18451821185816 ± 0.834921944293542	4.0437850610922 ± 1.15038480657088	0.0849426252198582 ± 0.0494405908488074	1.8498867263688 ± 1.24282606128719	2.29381493355319 ± 1.1610336369165
P value	0.870853	0.30967	0.0538169	0.898664	0.688611	0.955948	0.297002	0.0504253
